# Supplementary material
Source: MDPI journal article supplement (https://www.mdpi.com/2075-163X/11/3/252)
Supplement: s1 [file s1]

Supplementary Material

# Top-Down Synthesis of NaP Zeolite from Natural Zeolite for the Higher Removal Efficiency of Cs, Sr, and Ni

Seokju Hong <sup>1</sup> and Wooyong Um <sup>1,2,3,\*</sup>

<sup>1</sup> Division of Advanced Nuclear Engineering (DANE), Pohang University of Science and Technology (POSTECH), 77 Chongam-ro, Nam-Gu, Pohang 790-784, Korea; frederic@postech.ac.kr

<sup>2</sup> Division of Environmental Sciences and Engineering (DESE), Pohang University of Science and Technology (POSTECH), 77 Chongam-ro, Nam-Gu, Pohang 790-784, Korea

<sup>3</sup> Nuclear Environmental Technology Institute (NETI), Pohang University of Science and Technology (POSTECH), Pohang, Gyeongbuk 790-784, Korea

\* Correspondence: wooyongum@postech.ac.kr; Phone: +82-54-279-9563; Fax: +82-54-279-9559

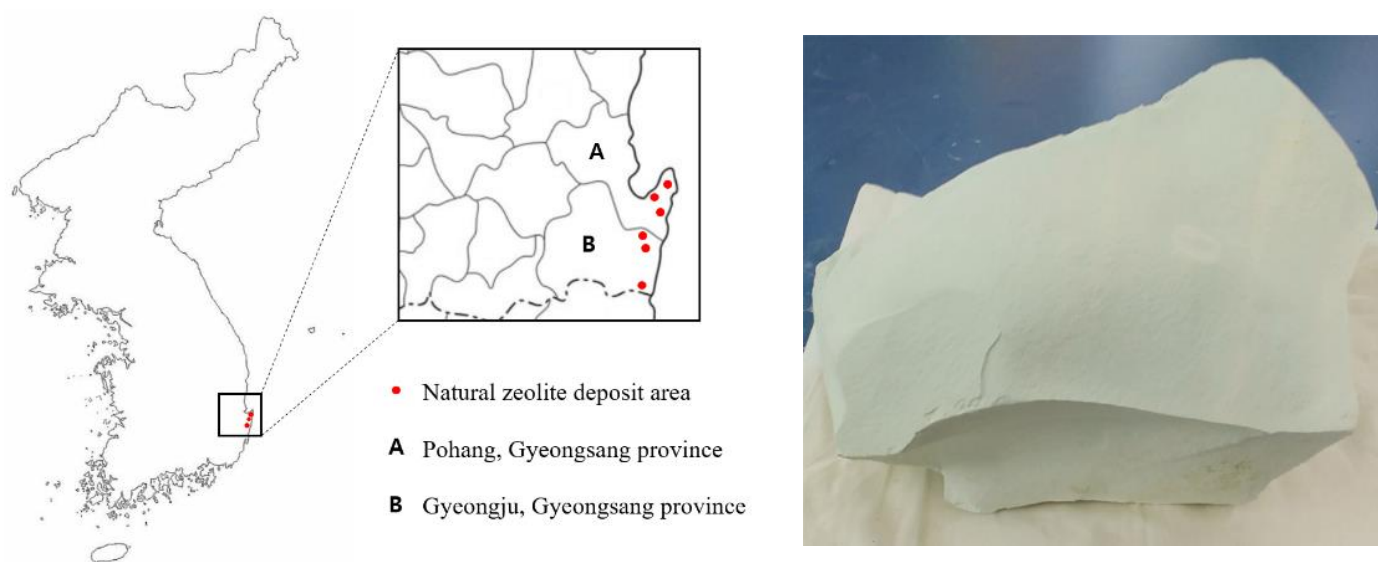

**Figure S1.** The location of a natural Korean zeolite-mining site (left) where the natural zeolite ore sample (right) was collected.

**Table S1.** Composition of Hanbit groundwater.

| Composition                   | Groundwater (ppm) |
|-------------------------------|-------------------|
| Na <sup>+</sup>               | 45.9              |
| K <sup>+</sup>                | 2.45              |
| Mg <sup>2+</sup>              | 9.76              |
| Ca <sup>2+</sup>              | 54.5              |
| Cl <sup>-</sup>               | 28.0              |
| SO <sub>4</sub> <sup>2-</sup> | 0.81              |
| NO <sub>3</sub> <sup>-</sup>  | 9.4               |

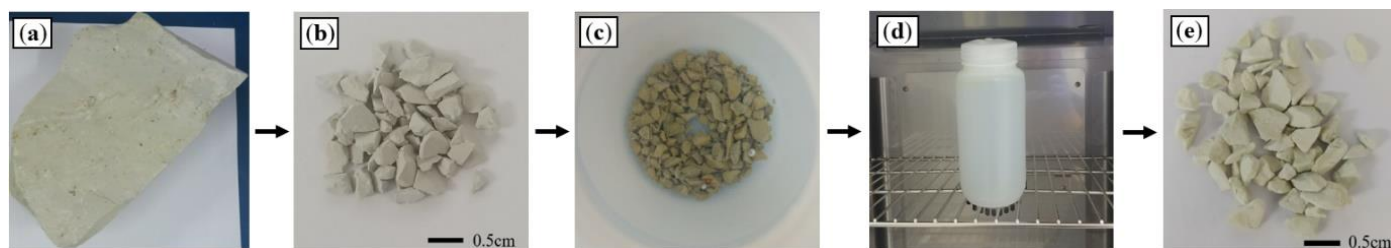

**Figure S2.** The “top-down” synthesis approach to produce granular-sized zeolites: (a) natural zeolite ore, (b) crushed natural zeolite (granular-sized), (c) zeolite immersed in NaOH solution, and (d) during the reaction process in the oven, and (e) resulting as-synthesized NaP zeolite (granular-sized).

**Table S2.** Chemical compositions of granular-sized natural and NaP zeolites expressed in wt.%.

| Compound                       | Natural Zeolite | NaP Zeolite |
|--------------------------------|-----------------|-------------|
| SiO <sub>2</sub>               | 72.43           | 48.70       |
| Al <sub>2</sub> O <sub>3</sub> | 14.10           | 23.61       |
| Na <sub>2</sub> O              | 3.51            | 14.8        |
| K <sub>2</sub> O               | 2.36            | 1.17        |
| CaO                            | 2.08            | 3.41        |
| MgO                            | 0.81            | 1.37        |
| Others                         | 3.81            | 6.94        |

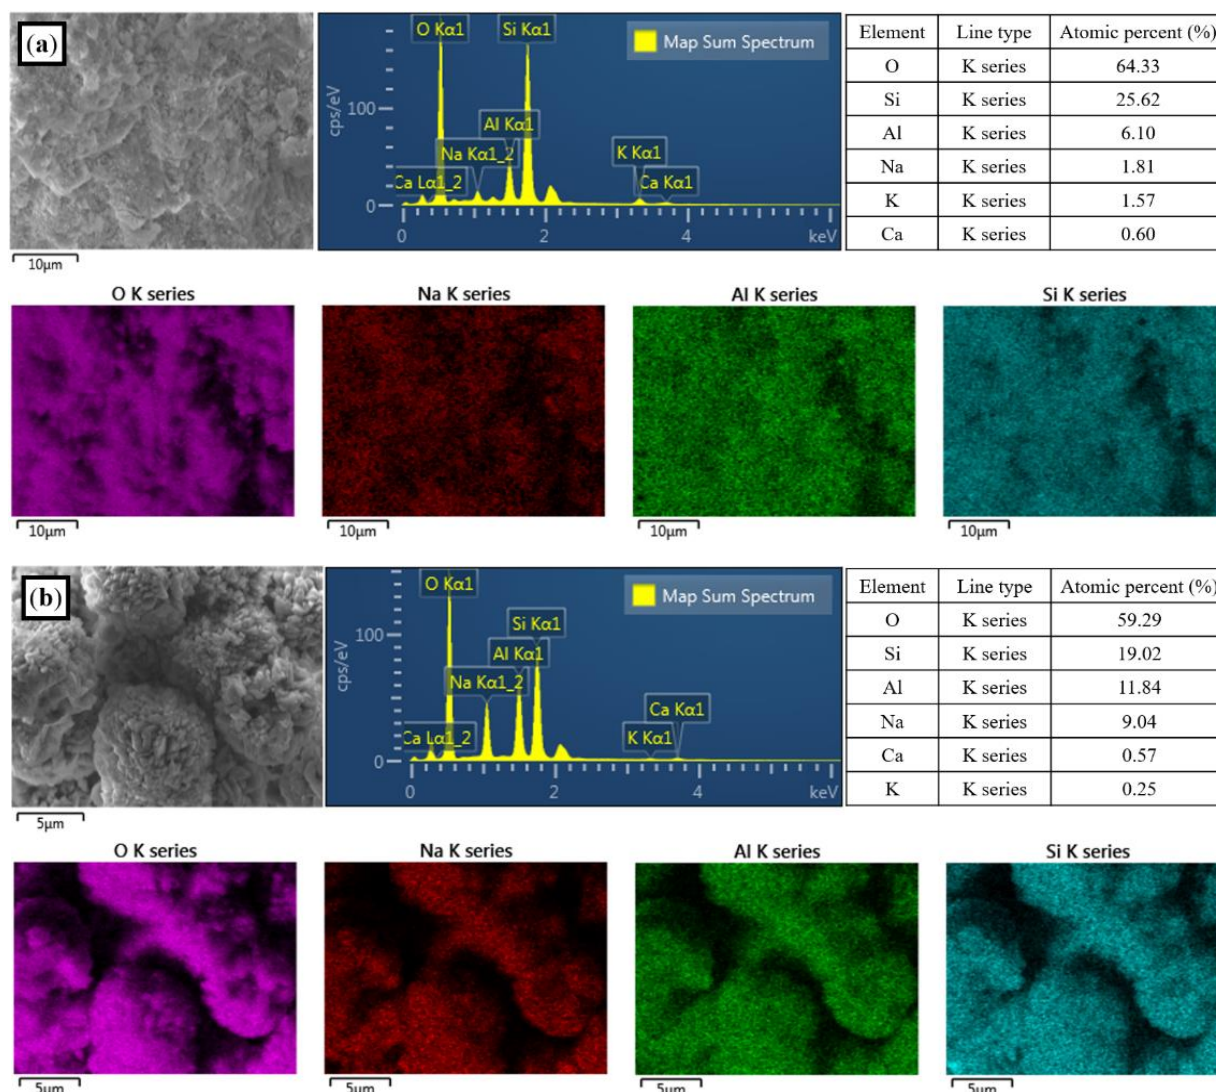

**Figure S3.** Elemental mapping of natural zeolite (a) and NaP zeolite (b) with SEM-EDX analysis.

**Table S3.** Textural parameters of natural and NaP zeolites.

|                                                                      | Natural Zeolite<br>(powder-sized) | NaP Zeolite<br>(powder-sized) | Natural Zeolite<br>(granular-sized) | NaP Zeolite<br>(granular-sized) |
|----------------------------------------------------------------------|-----------------------------------|-------------------------------|-------------------------------------|---------------------------------|
| Specific surface area ( $S_{\text{BET}}$ ) ( $\text{m}^2/\text{g}$ ) | 34.446                            | 89.298                        | 31.349                              | 95.949                          |
| Total pore volume ( $\text{cm}^3/\text{g}$ )                         | 0.122                             | 0.139                         | 0.077                               | 0.099                           |
| Micropore volume ( $\text{cm}^3/\text{g}$ )                          | 0.016                             | 0.036                         | 0.016                               | 0.021                           |

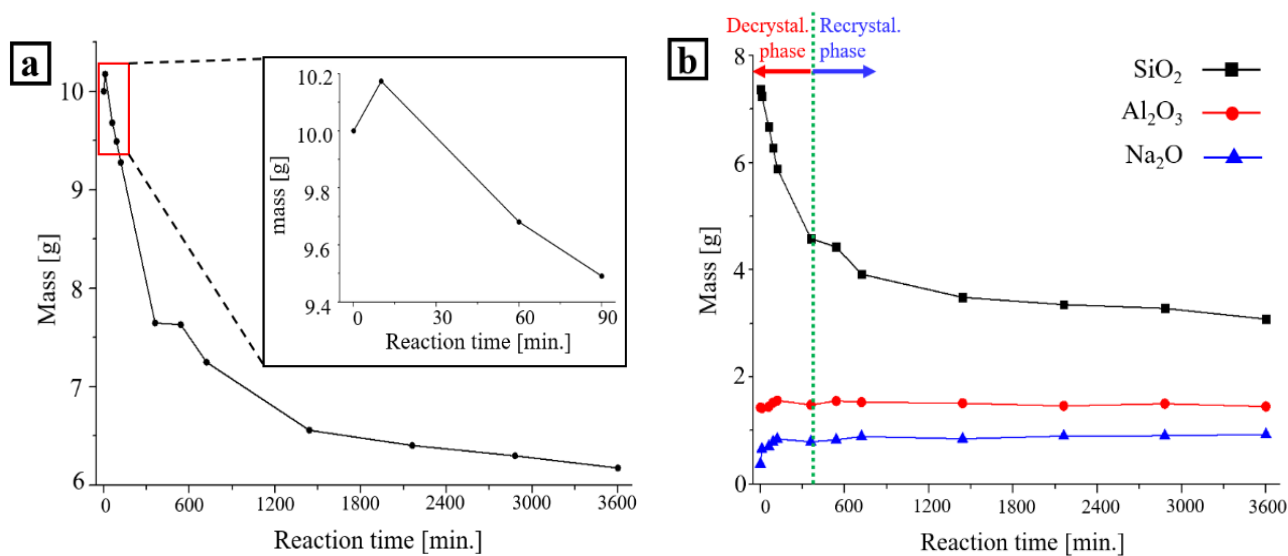

**Figure S4.** Mass variation (a) and composition variation (b) of zeolite with different reaction times.

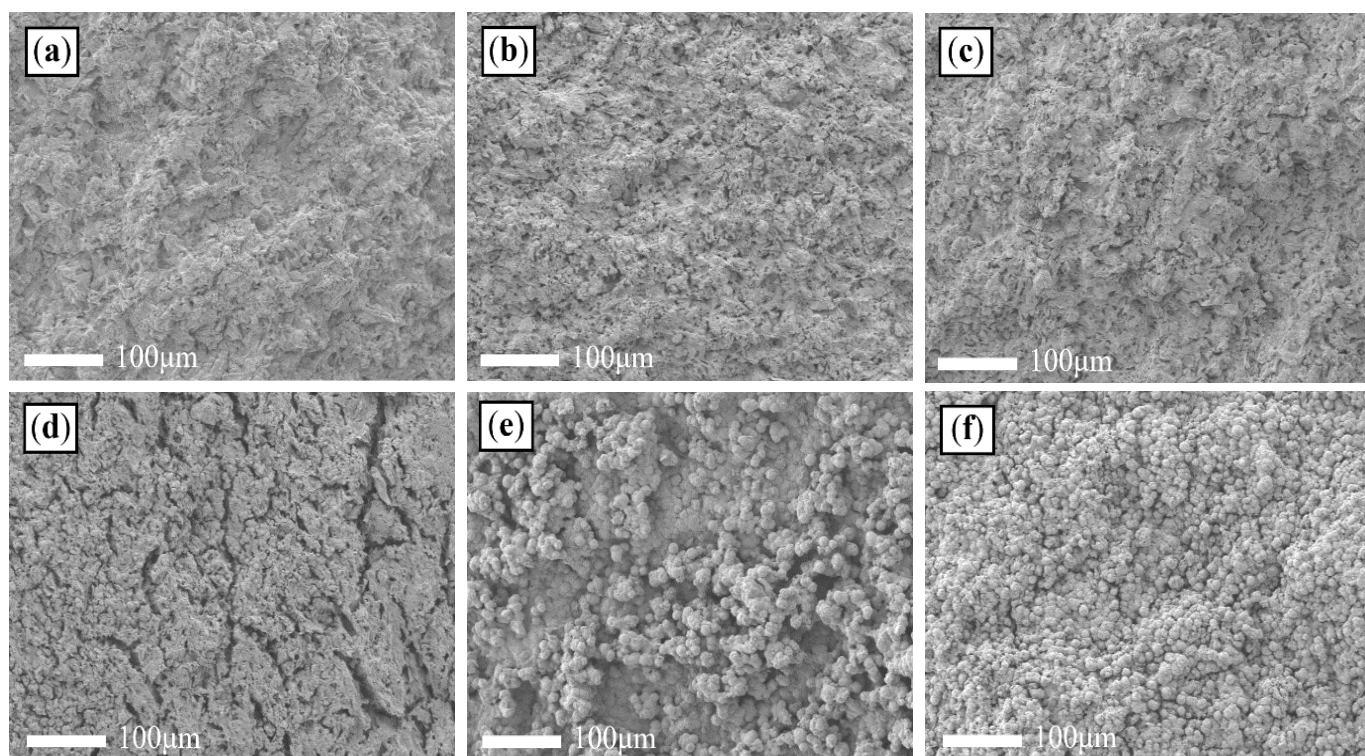

**Figure S5.** SEM images showing morphological changes at different reaction times; (a) 10 min, (b) 1 h, (c) 2 h, (d) 9 h, (e), 24 h, and (f) 48 h.



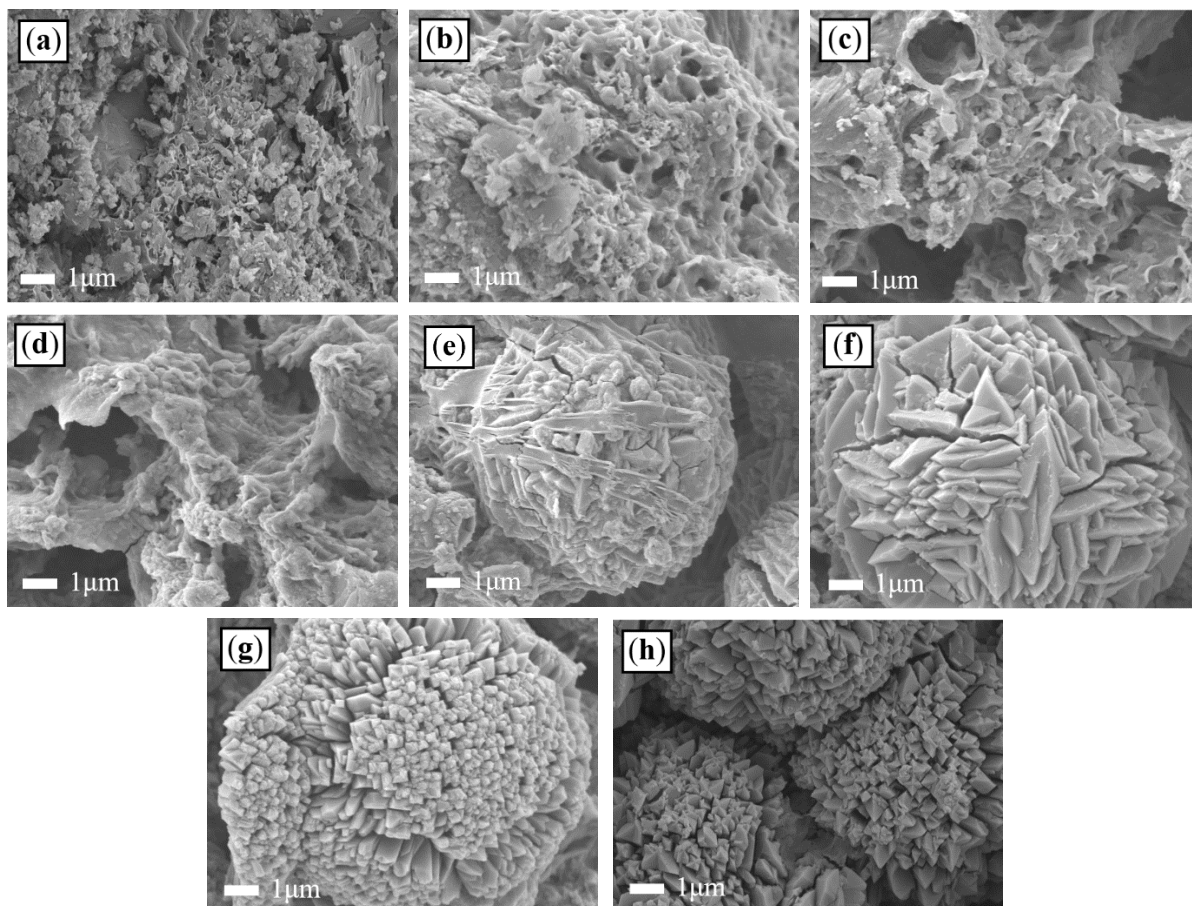

**Figure S6.** SEM images showing morphological changes at different reaction times; (a) Natural zeolite, (b) 10 min, (c) 1 h, (d) 2 h, (e) 9 h, (f) 24 h, (g) 48 h, and (h) 60 h.

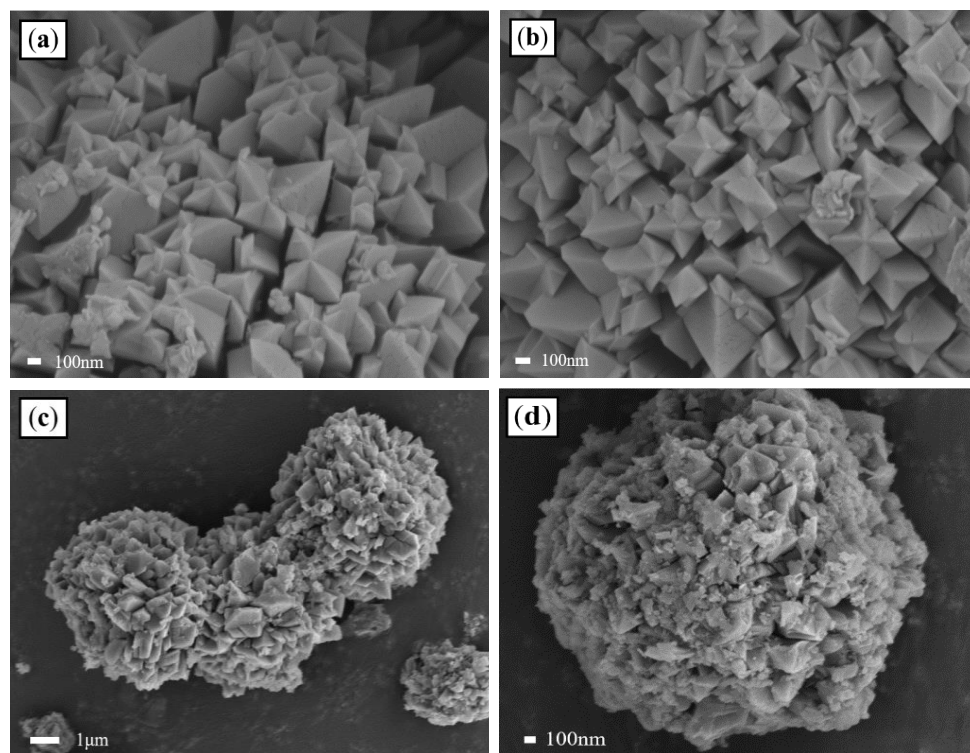

**Figure 7.** SEM images of two different-sized NaP zeolites (a), (b): Granular-sized NaP zeolite's surface, (c), (d): Powder-sized NaP zeolite's surface.

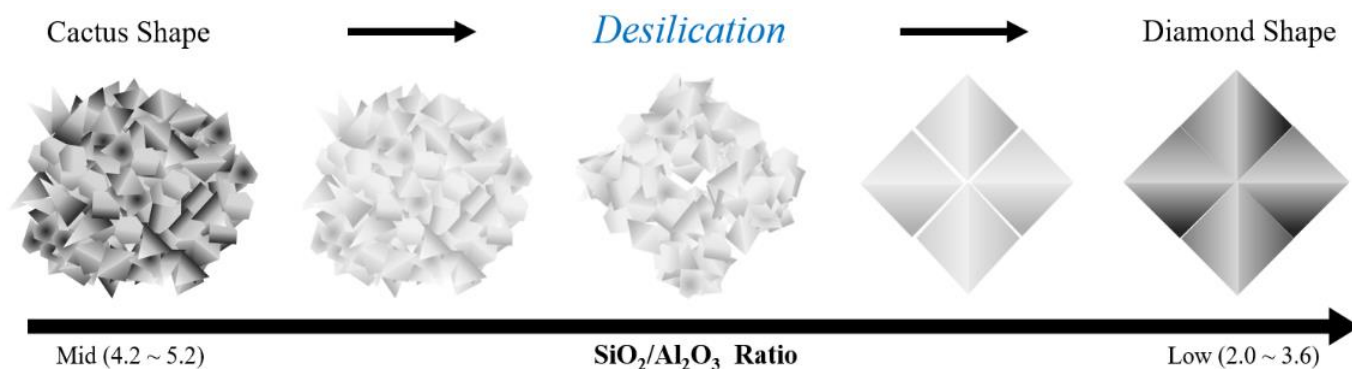

**Figure S8.** Morphological transition of the NaP zeolite with different Si/Al ratios.

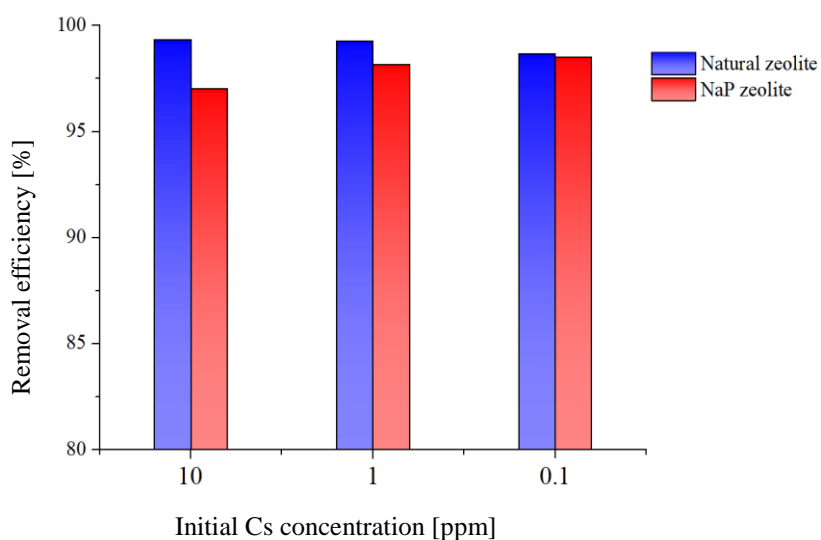

**Figure S9.** Batch sorption measurements for the removal of Cs at various concentrations in groundwater collected around the Hanbit NPP site. (Note: Error bars were omitted because of size constraints. The initial  $\text{Cs}^+$  concentrations were set to 10, 1, and 0.1 ppm, with the solid-to-solution ratio at 100 mL/g.
